# Supplementary material for: Diet-microbiome interactions promote enteric nervous system resilience following spinal cord injury
Source: PubMed Central journal article supplement (PMC11362535; doi:10.1038/s41522-024-00556-y), 2024-08-29
Supplement: 41522_2024_556_MOESM1_ESM.pdf [file 41522_2024_556_MOESM1_ESM.pdf]

## Supplementary Figure Legends

### Supplementary Figure 1, Related to Figure 2. Cohort-dependent impacts on SCI-triggered dysbiosis.

16S sequencing results from an independent cohort of male mice. **A, B**, Pre-surgery to end point (14-dpi) changes in fecal microbiome 16S rRNA alpha diversity represented by Chao1 (**A**) and Shannon (**B**) diversity measures. **C**, Principal component analysis (PCA) plot representing changes in overall community structure of fecal microbiomes. **D**, Microbial composition barplot, order level, of fecal microbiomes at 14-dpi. Asterisks in (**A**) and (**B**) represent a significant decrease in alpha diversity from 0-dpi to 14-dpi in the sham group. Each circle represents the average of all mice in a group for all but **C**, where each circle represents an individual mouse. N=3-8. \*  $P < 0.05$ . Data are shown as mean  $\pm$  SEM. Statistically significant differences were determined by repeated measures 2-way ANOVA with post-hoc Sidak's multiple comparison test to compare temporal changes within groups.

### Supplementary Figure 2, Related to Figure 3. Injury and diet-associated microbes are not sufficient to trigger NBD.

**A-C**, Heatmap of cytokines present in proximal colon tissue lysate from male and female uninjured germ-free mice that were colonized with either sham-derived or SCI-veh-derived fecal microbiomes (**A**), as assessed by multiplexed ELISA, with significant increases in CXCL1 (**B**) and IL-12p70 (**C**). **D-G**, Heatmap of serum metabolic markers, as assessed by multiplexed ELISA (**D**), with significant decreases in C-peptide (**E**), TNF (**F**), and ghrelin (**G**). **H-M**, Heatmap of serum metabolic markers in male mice with laminectomy (Sham) or injury (SCI-veh), as assessed by multiplexed ELISA (**H**), with significant decreases in C-peptide (**I**), TNF (**J**), glucagon (**K**), GLP-1 (**L**), and leptin (**M**). Each data point represents one mouse. Squares represent ex-GF males, hexagons represent ex-GF females, and circles represent SPF males. N=19-21 (**A-C**), N=14-15 (**D-G**), N=11-14 (**H-M**). \*  $P < 0.05$ , \*\*  $P < 0.01$ , \*\*\*  $P < 0.001$ , \*\*\*\*  $P < 0.0001$ . Data are shown as mean  $\pm$  SEM. Statistically significant differences were determined by two-tailed unpaired t-test.

### Supplementary Figure 3, Related to Figure 4. SCFA-induced IL-10 signaling is necessary for SCI recovery.

**A**, Heatmap of cytokines, assessed by multiplexed ELISA, in proximal colon tissue lysate from male wild-type mice with laminectomy (Sham), SCI with standard diet (SCI-vehicle), and SCI with inulin-supplemented diet (SCI-inulin). **B**, Concentration of colonic IL-1 $\beta$  by ELISA. **C-E**, Endpoint quantification of indicated short-chain fatty-acids from fecal pellets of male IL10rb KO mice with SCI (SCI-veh) or inulin-supplemented diet (SCI-inulin). **F**, Quantification of colonic free fatty acid receptor 2 (FFAR2) levels, by western blot, in male IL10rb KO mice with SCI. **G**, Heatmap of cytokines, assessed by multiplexed ELISA, in serum from male wild type mice with SCI treated with either vehicle (SCI-veh), tripropionin (SCI-TRP), or tributyrin (SCI-TRB). **H**, Concentration of serum IL-6 by ELISA. **I-K**, Endpoint quantification of indicated short-chain fatty-acids from serum of male mice with SCI, treated with vehicle (Veh), tripropionin (TRP), or tributyrin (TRB). Each data point represents one mouse. N=11-17 (**A, B**), N=7-10 (**C-F**), N=11-13 (**G, H**), N=5-6 (**I-K**). \*  $P < 0.05$ , \*\*  $P < 0.01$ . Data are shown as mean  $\pm$  SEM. Statistically significant differences were determined by ordinary one-way ANOVA with post-hoc Tukey's (**A, B**) or Dunnett's (**G, K**) multiple comparison test. Or by two-tailed unpaired t-test (**C-F**).

## Supplementary Figure 1. Cohort-dependent impacts on SCI-triggered dysbiosis

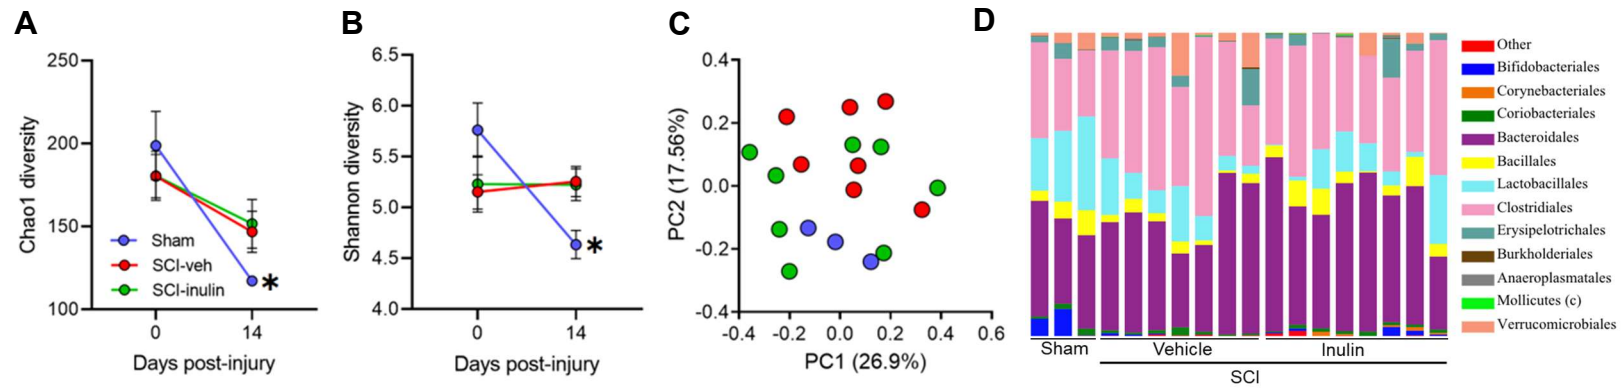

## Supplementary Figure 2. Injury and diet-associated microbes are not sufficient to trigger NBD

**A**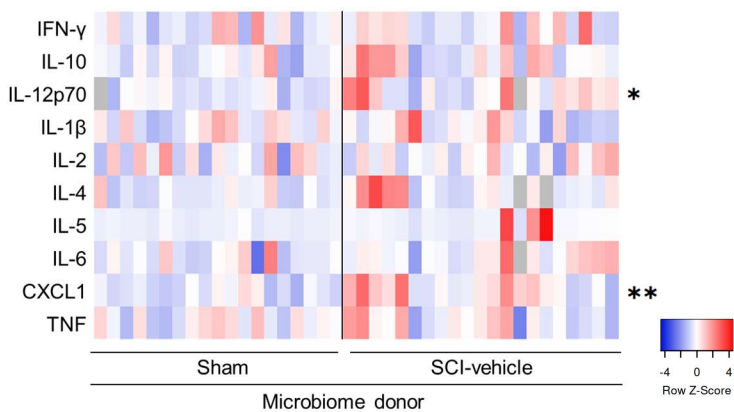**B**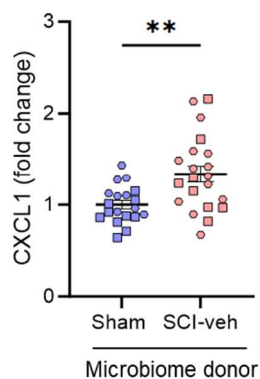**C**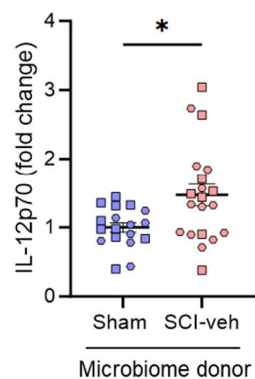**D**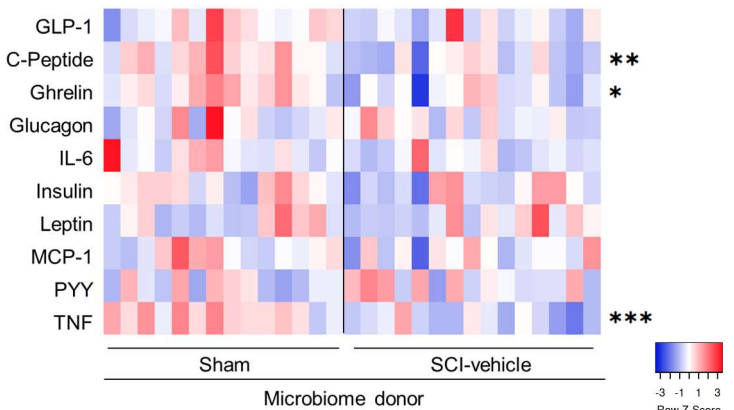**E**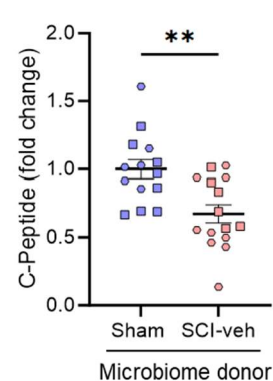**F**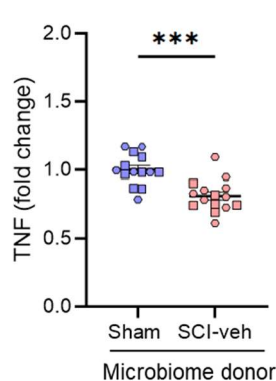**G**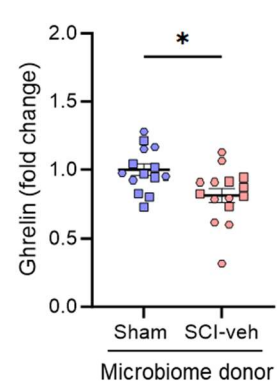**H**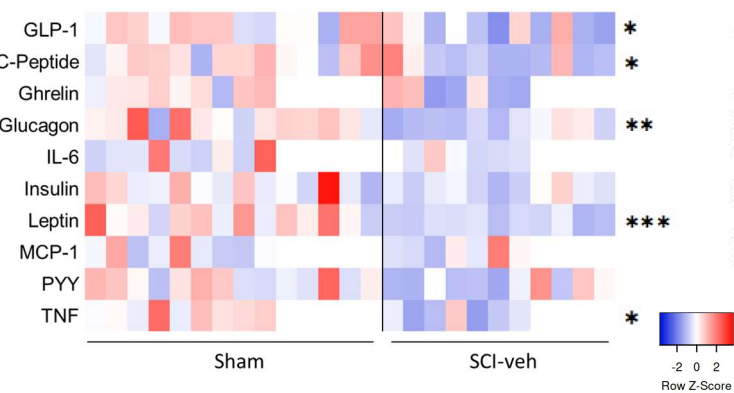**I**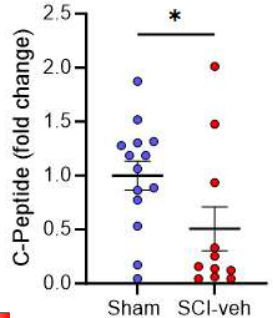**J**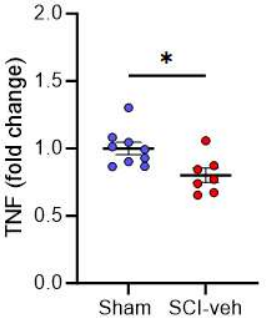**K**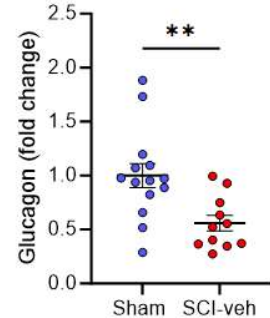**L**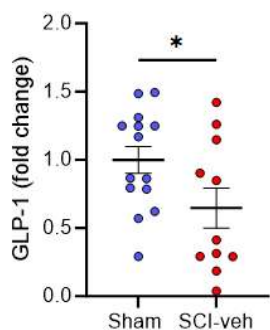**M**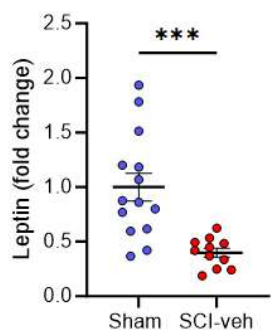

## Supplementary Figure 3. SCFA-induced IL-10 signaling is necessary for SCI recovery

**A**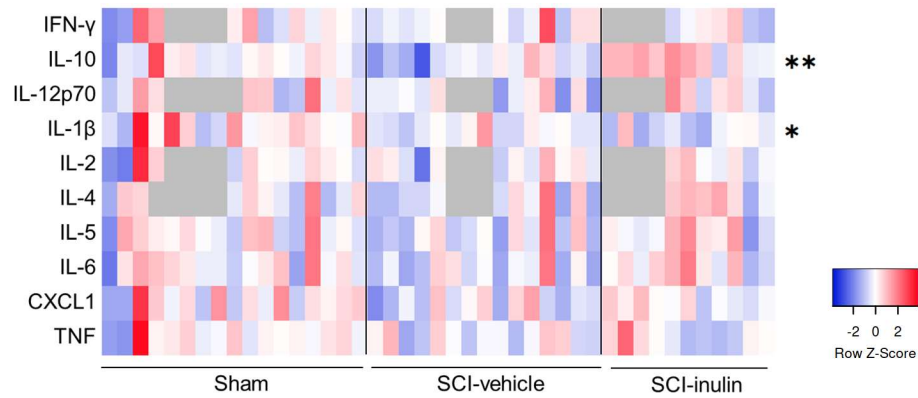**B**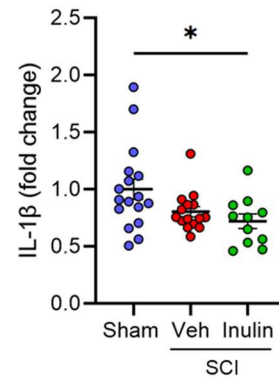**C**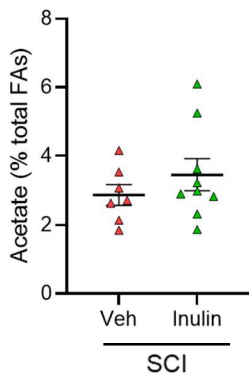**D**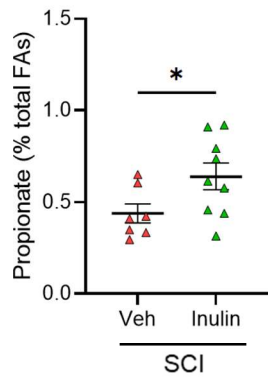**E**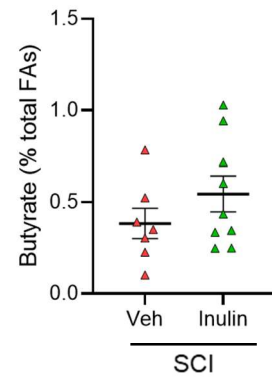**F**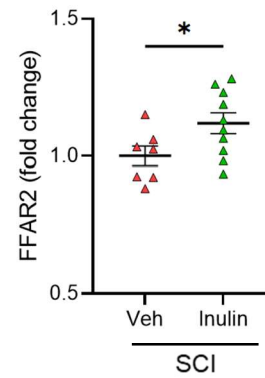**G**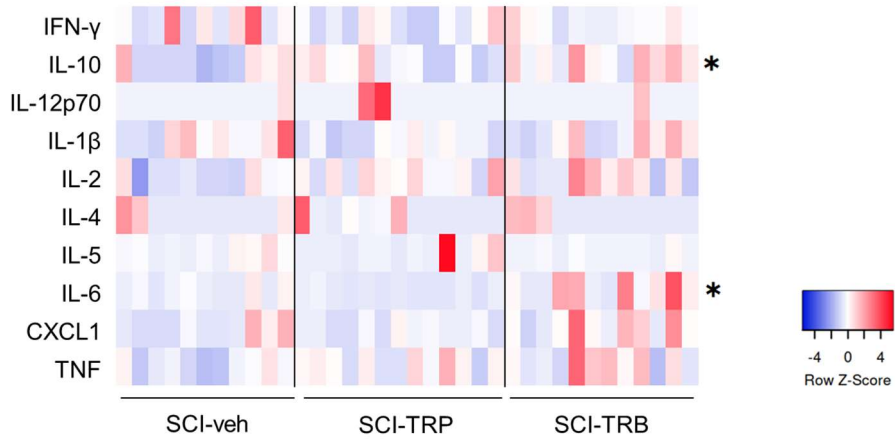**H**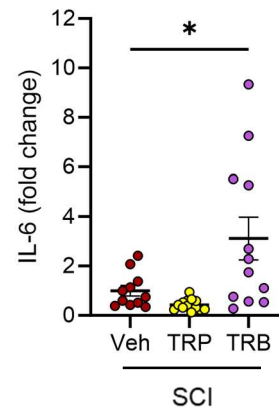**I**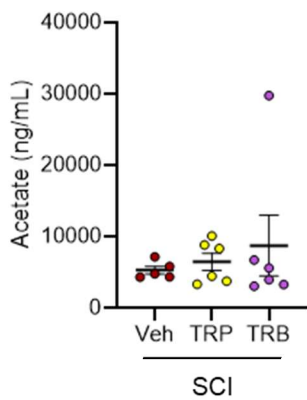**J**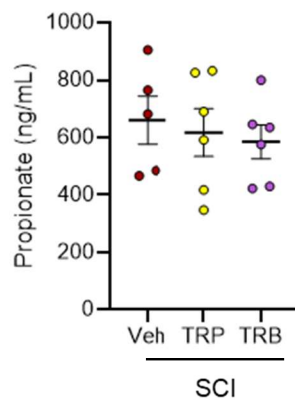**K**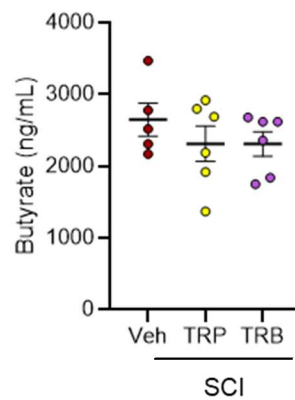

**Supplementary Table 1. SCI-induced microbiome compositional differences.** ASV-level taxonomic changes from stool microbiomes at 2 weeks post-SCI or sham, with 1% FDR

| <b>Endpoint</b>                                |                |                   |                                         |
|------------------------------------------------|----------------|-------------------|-----------------------------------------|
| <b>Sham vs SCI-Vehicle</b>                     |                |                   |                                         |
| <b>ASV</b>                                     | <b>Sham</b>    | <b>SCI-Veh</b>    | <b>Adjusted <i>p</i> value (1% FDR)</b> |
| <i>Bacteroides sp12288 (thetaitotaomicron)</i> | 0.0448409      | 0.0186638         | 6.94559E-07                             |
| <i>Bacteroidales sp12656</i>                   | 0.156247       | 0.0943178         | 1.16422E-30                             |
| <i>Staphylococcus lentus</i>                   | 0.0334159      | 0.00351487        | 1.50293E-08                             |
| <i>Lactobacillus johnsonii</i>                 | 0.0577711      | 0.0290364         | 5.24441E-08                             |
| <i>Clostridium celatum</i>                     | 0.0875609      | 0                 | 0                                       |
| <i>Lachnospiraceae sp33565</i>                 | 0.00720456     | 0.0506877         | 2.82898E-16                             |
| <i>Turicibacter sanguinis</i>                  | 0.124592       | 0.0603193         | 8.76368E-33                             |
| <b>Sham vs SCI-Inulin</b>                      |                |                   |                                         |
| <b>ASV</b>                                     | <b>Sham</b>    | <b>SCI-Inulin</b> | <b>Adjusted <i>p</i> value (1% FDR)</b> |
| <i>Bacteroides sp12288 (thetaitotaomicron)</i> | 0.0448409      | 0.0757577         | 5.81151E-08                             |
| <i>Bacteroidales sp12550</i>                   | 0.138146       | 0.028615          | 0                                       |
| <i>Bacteroidales sp12656</i>                   | 0.156247       | 0.188446          | 1.62892E-08                             |
| <i>Staphylococcus lentus</i>                   | 0.0334159      | 0.000353782       | 6.74178E-09                             |
| <i>Clostridium celatum</i>                     | 0.0875609      | 0                 | 0                                       |
| <i>Lachnospiraceae sp33565</i>                 | 0.00720456     | 0.040268          | 6.73239E-09                             |
| <i>Turicibacter sanguinis</i>                  | 0.124592       | 0                 | 0                                       |
| <b>SCI-Vehicle vs SCI-Inulin</b>               |                |                   |                                         |
| <b>ASV</b>                                     | <b>SCI-Veh</b> | <b>SCI-Inulin</b> | <b>Adjusted <i>p</i> value (1% FDR)</b> |
| <i>Bacteroides sp12288 (thetaitotaomicron)</i> | 0.0186638      | 0.0757577         | 1.15921E-15                             |
| <i>Bacteroidales sp12550</i>                   | 0.135412       | 0.028615          | 0                                       |
| <i>Bacteroidales sp12656</i>                   | 0.0943178      | 0.188446          | 2.24226E-38                             |
| <i>Lactobacillus johnsonii</i>                 | 0.0290364      | 0.061178          | 5.5047E-06                              |
| <i>Turicibacter sanguinis</i>                  | 0.0603193      | 0                 | 2.91586E-17                             |
| <b>Pre-SCI vs Post-SCI</b>                     |                |                   |                                         |
| <b>ASV</b>                                     | <b>SCI-Pre</b> | <b>SCI-2wks</b>   | <b>Adjusted <i>p</i> value (1% FDR)</b> |
| <i>Bacteroidales sp12656</i>                   | 0.158599       | 0.0943178         | 2.06832E-30                             |
| <i>Lactobacillus johnsonii</i>                 | 0.193283       | 0.0290364         | 0                                       |
| <i>Clostridium celatum</i>                     | 0.022866       | 0                 | 2.92759E-05                             |
| <i>Lachnospiraceae sp33565</i>                 | 0.0128364      | 0.0506877         | 6.26693E-12                             |
| <i>Turicibacter sanguinis</i>                  | 0.00972012     | 0.0603193         | 7.71416E-20                             |

**Supplementary Table 2. LEfSE identified taxonomic changes from stool microbiomes at 2 weeks post-SCI or sham**

| <b>Bacterial taxa</b>                                                                                                                           | <b>Group</b> | <b>Effect size</b> | <b>p-value</b> |
|-------------------------------------------------------------------------------------------------------------------------------------------------|--------------|--------------------|----------------|
| k Bacteria.p Firmicutes.c Clostridia.o Clostridiales.f Lachnospiraceae.g NA.s sp33760                                                           | SCI.Inulin   | 3.28014007         | 0.030197383    |
| k Bacteria.p Firmicutes.c Clostridia.o Clostridiales.f NA.g NA.s sp31072                                                                        | SCI.Inulin   | 2.98922362         | 0.048484305    |
| k Bacteria.p Proteobacteria.c Gammaproteobacteria.o Pseudomonadales.f Moraxellaceae.g Acinetobacter.s radiorensistens                           | SCI.Inulin   | 3.18049855         | 0.012764197    |
| k Bacteria.p Firmicutes.c Clostridia.o Clostridiales.f Lachnospiraceae.g NA.s sp32706                                                           | SCI.Inulin   | 3.82883697         | 0.01334429     |
| k Bacteria.p Firmicutes.c Clostridia.o Clostridiales.f Lachnospiraceae.g NA.s sp32638                                                           | SCI.Inulin   | 3.78461598         | 0.023383895    |
| k Bacteria.p Firmicutes.c Clostridia.o Clostridiales.f Lachnospiraceae.g NA.s sp33456                                                           | SCI.Inulin   | 3.17262743         | 0.027158625    |
| k Bacteria.p Firmicutes.c Clostridia.o Clostridiales.f Lachnospiraceae.g NA.s sp33694                                                           | SCI.Inulin   | 3.76036576         | 0.019757099    |
| k Bacteria.p Firmicutes.c Clostridia.o Clostridiales.f Ruminococcaceae.g NA.s sp34867                                                           | SCI.Inulin   | 3.30028204         | 0.027323722    |
| k Bacteria.p Firmicutes.c Clostridia.o Clostridiales.f Ruminococcaceae.g Anaerotruncus.s sp34475                                                | SCI.Inulin   | 2.99522399         | 0.045806314    |
| k Bacteria.p Proteobacteria.c Gammaproteobacteria.o Pseudomonadales                                                                             | SCI.Inulin   | 3.25550068         | 0.016389554    |
| k Bacteria.p Proteobacteria.c Gammaproteobacteria.o Pseudomonadales.f Moraxellaceae.g Acinetobacter                                             | SCI.Inulin   | 3.22914314         | 0.016389554    |
| k Bacteria.p Firmicutes.c Clostridia.o Clostridiales.f Lachnospiraceae.g NA.s sp33417                                                           | SCI.Inulin   | 3.75893236         | 0.011625603    |
| k Bacteria.p Bacteroidetes.c Bacteroidia.o Bacteroidales.f Bacteroidaceae.g Bacteroides.s sp12288_thetaiotaomi cron                             | SCI.Inulin   | 4.43785167         | 0.028207093    |
| k Bacteria.p Firmicutes.c Clostridia.o Clostridiales.f Lachnospiraceae.g NA.s sp33525                                                           | SCI.Inulin   | 3.26973262         | 0.048484305    |
| k Bacteria.p Firmicutes.c Clostridia.o Clostridiales.f Lachnospiraceae.g NA.s sp32701                                                           | SCI.Inulin   | 3.96461728         | 0.015562692    |
| k Bacteria.p Firmicutes.c Clostridia.o Clostridiales.f Lachnospiraceae.g NA.s sp33616 sp33639                                                   | SCI.Inulin   | 3.42818688         | 0.029407217    |
| k Bacteria.p Firmicutes.c Bacilli.o Lactobacillales.f Enterococcaceae.g Enterococcus.s faecalis                                                 | SCI.Inulin   | 3.05716304         | 0.024861262    |
| k Bacteria.p Proteobacteria.c Gammaproteobacteria.o Pseudomonadales.f Moraxellaceae.g Acinetobacter.s calc oaceticus radiorensistens variabilis | SCI.Inulin   | 3.20043929         | 0.041388896    |
| k Bacteria.p Firmicutes.c Clostridia.o Clostridiales.f Ruminococcaceae.g NA.s sp34731                                                           | SCI.Inulin   | 3.43239165         | 0.027158625    |
| k Bacteria.p Firmicutes.c Bacilli.o Lactobacillales.f Enterococcaceae                                                                           | SCI.Inulin   | 3.0725174          | 0.024861262    |
| k Bacteria.p Bacteroidetes.c Bacteroidia.o Bacteroidales.f Bacteroidaceae                                                                       | SCI.Inulin   | 4.41723887         | 0.028207093    |
| k Bacteria.p Bacteroidetes.c Bacteroidia.o Bacteroidales.f Bacteroidaceae.g Bacteroides                                                         | SCI.Inulin   | 4.45069433         | 0.028207093    |
| k Bacteria.p Firmicutes.c Clostridia.o Clostridiales.f Lachnospiraceae.g NA.s sp32758                                                           | SCI.Inulin   | 3.97272763         | 0.009403563    |
| k Bacteria.p Firmicutes.c Clostridia.o Clostridiales.f Lachnospiraceae.g NA.s sp32623                                                           | SCI.Inulin   | 3.56178608         | 0.041041078    |
| k Bacteria.p Firmicutes.c Clostridia.o Clostridiales.f NA.g NA.s sp31116                                                                        | SCI.Inulin   | 3.05573343         | 0.04376775     |
| k Bacteria.p Proteobacteria.c Gammaproteobacteria.o Pseudomonadales.f Moraxellaceae                                                             | SCI.Inulin   | 3.23322001         | 0.016389554    |
| k Bacteria.p Firmicutes.c Bacilli.o Lactobacillales.f Enterococcaceae.g Enterococcus                                                            | SCI.Inulin   | 3.06357795         | 0.024861262    |
| k Bacteria.p Firmicutes.c Clostridia.o Clostridiales.f Lachnospiraceae.g NA.s sp33721                                                           | SCI.Inulin   | 3.08898072         | 0.009139753    |
| k Bacteria.p Firmicutes.c Clostridia.o Clostridiales.f Ruminococcaceae.g NA.s sp35841                                                           | SCI          | 3.08050444         | 0.030197383    |
| k Bacteria.p Firmicutes.c Clostridia.o Clostridiales.f Lachnospiraceae.g NA.s sp33658                                                           | SCI          | 3.42184273         | 0.023786517    |
| k Bacteria.p Firmicutes.c Clostridia.o Clostridiales.f Lachnospiraceae.g NA.s sp32702                                                           | SCI          | 3.85317688         | 0.024861262    |
| k Bacteria.p Firmicutes.c Clostridia.o Clostridiales.f Lachnospiraceae.g Lachnoclostridium.s sp32402                                            | SCI          | 3.69380202         | 0.034609178    |
| k Bacteria.p Firmicutes.c Clostridia.o Clostridiales.f Lachnospiraceae.g NA.s sp33739                                                           | SCI          | 3.15551336         | 0.046329809    |
| k Bacteria.p Firmicutes.c Clostridia.o Clostridiales.f Lachnospiraceae                                                                          | SCI          | 5.05697495         | 0.048668305    |
| k Bacteria.p Firmicutes.c Clostridia.o Clostridiales.f Lachnospiraceae.g NA.s sp33565                                                           | SCI          | 4.28952463         | 0.027158625    |
| k Bacteria.p Firmicutes.c Clostridia.o Clostridiales.f Lachnospiraceae.g NA.s sp32872                                                           | SCI          | 3.09241069         | 0.028207093    |
| k Bacteria.p Firmicutes.c Clostridia.o Clostridiales.f Ruminococcaceae.g Oscillibacter.s sp34648                                                | SCI          | 3.04716797         | 0.028937471    |
| k Bacteria.p Firmicutes.c Clostridia.o Clostridiales.f Lachnospiraceae.g NA.s sp33718                                                           | SCI          | 3.35285573         | 0.023786517    |
| k Bacteria.p Firmicutes.c Clostridia.o Clostridiales.f Lachnospiraceae.g NA.s sp32146                                                           | SCI          | 3.27855544         | 0.027158625    |
| k Bacteria.p Firmicutes.c Clostridia.o Clostridiales.f Ruminococcaceae.g NA.s sp35077                                                           | Sham         | 3.08269556         | 0.027323722    |
| k Bacteria.p Firmicutes.c Bacilli.o Bacillales.f Staphylococcaceae.g Staphylococcus.s lentus                                                    | Sham         | 4.22428258         | 0.015562692    |

| <b>Supplementary Table 2 (continued)</b>                                                                                   |              |                    |                |
|----------------------------------------------------------------------------------------------------------------------------|--------------|--------------------|----------------|
| <b>Bacterial taxa</b>                                                                                                      | <b>Group</b> | <b>Effect size</b> | <b>p-value</b> |
| k Bacteria.p Firmicutes.c Erysipelotrichia.o Erysipelotrichales                                                            | Sham         | 4.77308354         | 0.015562692    |
| k Bacteria.p Firmicutes.c Clostridia.o Clostridiales.f Clostridiaceae                                                      | Sham         | 4.65015938         | 0.025161049    |
| k Bacteria.p Firmicutes.c Clostridia.o Clostridiales.f Clostridiaceae.g Clostridium.s celatum                              | Sham         | 4.6301129          | 0.009139753    |
| k Bacteria.p Firmicutes.c Clostridia.o Clostridiales.f Ruminococcaceae.g NA.s sp35361                                      | Sham         | 3.59813998         | 0.019660049    |
| k Bacteria.p Firmicutes.c Clostridia.o Clostridiales.f Ruminococcaceae.g NA.s sp35360                                      | Sham         | 3.08921088         | 0.041041078    |
| k Bacteria.p Proteobacteria.c Betaproteobacteria.o Burkholderiales.f Alcaligenaceae                                        | Sham         | 3.43800153         | 0.011391522    |
| k Bacteria.p Firmicutes.c Bacilli.o Bacillales.f Staphylococcaceae.g Staphylococcus                                        | Sham         | 4.27885163         | 0.037902914    |
| k Bacteria.p Firmicutes.c Clostridia.o Clostridiales.f Lachnospiraceae.g NA.s sp33419                                      | Sham         | 3.32307121         | 0.015562692    |
| k Bacteria.p Bacteroidetes.c Bacteroidia.o Bacteroidales.f NA.g NA.s sp12550                                               | Sham         | 4.72904022         | 0.048484305    |
| k Bacteria.p Firmicutes.c Clostridia.o Clostridiales.f Clostridiaceae.g Clostridium                                        | Sham         | 4.65240631         | 0.025161049    |
| k Bacteria.p Firmicutes.c Erysipelotrichia.o Erysipelotrichales.f Erysipelotrichaceae.g Turicibacter.s sanguinis           | Sham         | 4.7786212          | 0.012764197    |
| k Bacteria.p Firmicutes.c Bacilli.o Bacillales.f Staphylococcaceae.g Jeotgalicoccus                                        | Sham         | 3.42659395         | 0.013728404    |
| k Bacteria.p Firmicutes.c Bacilli.o Bacillales.f Staphylococcaceae                                                         | Sham         | 4.30010345         | 0.037902914    |
| k Bacteria.p Firmicutes.c Erysipelotrichia                                                                                 | Sham         | 4.76829196         | 0.015562692    |
| k Bacteria.p Firmicutes.c Clostridia.o Clostridiales.f Lachnospiraceae.g NA.s sp33537                                      | Sham         | 3.08288654         | 0.041388896    |
| k Bacteria.p Firmicutes.c Clostridia.o Clostridiales.f NA.g NA.s sp31125                                                   | Sham         | 3.07776853         | 0.041388896    |
| k Bacteria.p Firmicutes.c Clostridia.o Clostridiales.f NA.g NA.s sp31122                                                   | Sham         | 3.42566575         | 0.034411331    |
| k Bacteria.p Firmicutes.c Erysipelotrichia.o Erysipelotrichales.f Erysipelotrichaceae.g Turicibacter                       | Sham         | 4.801587           | 0.012764197    |
| k Bacteria.p Firmicutes.c Erysipelotrichia.o Erysipelotrichales.f Erysipelotrichaceae                                      | Sham         | 4.77876752         | 0.015562692    |
| k Bacteria.p Firmicutes.c Clostridia.o Clostridiales.f Ruminococcaceae.g NA.s sp35498                                      | Sham         | 3.08729405         | 0.041388896    |
| k Bacteria.p Proteobacteria.c Betaproteobacteria.o Burkholderiales                                                         | Sham         | 3.41658553         | 0.011391522    |
| k Bacteria.p Proteobacteria.c Betaproteobacteria                                                                           | Sham         | 3.40401102         | 0.011391522    |
| k Bacteria.p Firmicutes.c Bacilli.o Bacillales                                                                             | Sham         | 4.30946747         | 0.037902914    |
| k Bacteria.p Proteobacteria.c Betaproteobacteria.o Burkholderiales.f Alcaligenaceae.g Parasutterella                       | Sham         | 3.41352673         | 0.011391522    |
| k Bacteria.p Firmicutes.c Bacilli.o Bacillales.f Staphylococcaceae.g Jeotgalicoccus.s halophilus_halotolerans_nan haiensis | Sham         | 3.4063761          | 0.013728404    |
| k Bacteria.p Proteobacteria.c Betaproteobacteria.o Burkholderiales.f Alcaligenaceae.g Parasutterella.s excremen tihominis  | Sham         | 3.42627509         | 0.011391522    |

**Supplementary Table 3. Bacterial taxa significantly different following SCI in an independent cohort.** With 1% FDR correction, alterations between Sham and SCI (a), sham and SCI-inulin (b), or SCI and SCI-inulin (c). Grey boxes indicate significant comparisons (1% FDR) between pre and post-SCI groups at 2wks post injury.

| ASV                                           | Sham     | SCI-Veh  | SCI-Inulin | Sig comparisons by 1% FDR | Identified in independent cohort (Fig 2) |
|-----------------------------------------------|----------|----------|------------|---------------------------|------------------------------------------|
| <i>Akkermansia muciniphila</i>                | 0.032851 | 0.04787  | 0.016194   | c                         |                                          |
| <i>Alistipes sp14336</i>                      | 0.029102 | 0.067027 | 0.06584    | a, b                      |                                          |
| <i>Allobaculum sp36555</i>                    | 0.000152 | 0.021406 | 0.006325   | a                         |                                          |
| <i>Bacteroidales sp12473-sp12526-sp12633</i>  | 0.074217 | 0.084304 | 0.042379   | b, c                      |                                          |
| <i>Bacteroidales sp12610</i>                  | 0        | 0.030116 | 0.013937   | a                         |                                          |
| <i>Bacteroidales sp12645</i>                  | 0        | 0.019732 | 0.058406   | b, c                      |                                          |
| <i>Bacteroidales sp12656</i>                  | 0.105666 | 0.052678 | 0.156417   | a, b, c                   | Yes                                      |
| <i>Bacteroidales sp12768</i>                  | 0.033087 | 0.05611  | 0.04598    | a                         |                                          |
| <i>Bacteroides sp12288 (thetaitaomicron)</i>  | 0.080995 | 0.071137 | 0.050251   | b, c                      | Yes                                      |
| <i>Bifidobacterium choerinum-pseudolongum</i> | 0.049002 | 0.002335 | 0.007556   | a, b                      |                                          |
| <i>Lachnoclostridium sp32402</i>              | 0.021026 | 0.040619 | 0.01123    | c                         |                                          |
| <i>Lachnospiraceae sp32778</i>                | 0.009123 | 0.043795 | 0.014431   | a, c                      |                                          |
| <i>Lactobacillus johnsonii</i>                | 0.237838 | 0.079619 | 0.078155   | a, b                      | Yes                                      |
| <i>Staphylococcus lentus</i>                  | 0.027879 | 0.005809 | 0.019373   | a                         | Yes                                      |



**Supplementary Table 4. Independent SCI-induced microbiome compositional differences.** ASV-level taxonomic changes from stool microbiomes at 2 weeks post-SCI or sham, with 1% FDR, from independent cohort

| <b>Endpoint</b>                                |                |                   |                                  |
|------------------------------------------------|----------------|-------------------|----------------------------------|
| <b>Sham vs SCI-Vehicle</b>                     |                |                   |                                  |
| <b>ASV</b>                                     | <b>Sham</b>    | <b>SCI-Veh</b>    | <b>Adjusted p value (1% FDR)</b> |
| <i>Bifidobacterium choerinum-pseudolongum</i>  | 0.0490019      | 0.00233502        | 1.38505E-15                      |
| <i>Bacteroidales sp12610</i>                   | 0              | 0.0301156         | 2.27912E-07                      |
| <i>Bacteroidales sp12656</i>                   | 0.105666       | 0.0526781         | 1.42237E-19                      |
| <i>Bacteroidales sp12768</i>                   | 0.0330871      | 0.05611           | 7.46328E-05                      |
| <i>Alistipes sp14336</i>                       | 0.0291018      | 0.0670273         | 7.71846E-11                      |
| <i>Staphylococcus lentus</i>                   | 0.0278791      | 0.00580894        | 0.000146098                      |
| <i>Lactobacillus johnsonii</i>                 | 0.237838       | 0.0796191         | 0                                |
| <i>Lachnospiraceae sp32778</i>                 | 0.00912332     | 0.0437946         | 2.64513E-09                      |
| <i>Allobaculum p36555</i>                      | 0.00015199     | 0.0214064         | 0.000254523                      |
| <b>Sham vs SCI-Inulin</b>                      |                |                   |                                  |
| <b>ASV</b>                                     | <b>Sham</b>    | <b>SCI-Inulin</b> | <b>Adjusted p value (1% FDR)</b> |
| <i>Bifidobacterium choerinum-pseudolongum</i>  | 0.0490019      | 0.00755608        | 4.74124E-08                      |
| <i>Bacteroides sp12288 (thetaitotaomicron)</i> | 0.0809949      | 0.0502512         | 4.99359E-05                      |
| <i>Bacteroidales sp12473-sp12526-sp12633</i>   | 0.0742173      | 0.0423789         | 2.67067E-05                      |
| <i>Bacteroidales sp12645</i>                   | 0              | 0.0584062         | 1.67097E-14                      |
| <i>Bacteroidales sp12656</i>                   | 0.105666       | 0.156417          | 2.43458E-11                      |
| <i>Alistipes sp14336</i>                       | 0.0291018      | 0.0658396         | 1.27625E-06                      |
| <i>Lactobacillus johnsonii</i>                 | 0.237838       | 0.0781547         | 0                                |
| <b>SCI-Vehicle vs SCI-Inulin</b>               |                |                   |                                  |
| <b>ASV</b>                                     | <b>SCI-Veh</b> | <b>SCI-Inulin</b> | <b>Adjusted p value (1% FDR)</b> |
| <i>Bacteroides sp12288 (thetaitotaomicron)</i> | 0.0711372      | 0.0502512         | 0.00013929                       |
| <i>Bacteroidales sp12473-sp12526-sp12633</i>   | 0.0843043      | 0.0423789         | 2.45024E-14                      |
| <i>Bacteroidales sp12645</i>                   | 0.0197316      | 0.0584062         | 1.95902E-12                      |
| <i>Bacteroidales sp12656</i>                   | 0.0526781      | 0.156417          | 0                                |
| <i>Lachnoclostridium sp32402</i>               | 0.040619       | 0.0112297         | 8.5429E-08                       |
| <i>Lachnospiraceae sp32778</i>                 | 0.0437946      | 0.0144314         | 8.76893E-08                      |
| <i>Akkermansia muciniphila</i>                 | 0.0478695      | 0.0161938         | 7.92208E-09                      |
| <b>Pre SCI vs Post SCI</b>                     |                |                   |                                  |
| <b>ASV</b>                                     | <b>SCI-Pre</b> | <b>SCI-2wks</b>   | <b>Adjusted p value (1% FDR)</b> |
| <i>Other</i>                                   | 0.0400304      | 0.00230997        | 3.01332E-20                      |
| <i>Bifidobacterium choerinum-pseudolongum</i>  | 0.0387627      | 0.00233502        | 5.35722E-19                      |
| <i>Bacteroidales sp12473-sp12526-sp12633</i>   | 0.0566063      | 0.0843043         | 1.20298E-11                      |
| <i>Bacteroidales sp12768</i>                   | 0.0328508      | 0.05611           | 1.223E-08                        |
| <i>Enterococcus faecalis</i>                   | 0.00133197     | 0.0180171         | 4.33168E-05                      |
| <i>Lactobacillus johnsonii</i>                 | 0.130668       | 0.0796191         | 1.57727E-35                      |
| <i>Lachnoclostridium sp32402</i>               | 0.00983318     | 0.040619          | 4.98182E-14                      |
| <i>Lachnospiraceae sp32778</i>                 | 0.00608032     | 0.0437946         | 3.05544E-20                      |
| <i>Ruminococcaceae sp35297</i>                 | 0.0262177      | 0.0028927         | 1.11286E-08                      |
| <i>Allobaculum sp36555</i>                     | 0.0653365      | 0.0214064         | 7.94526E-27                      |

**Supplementary Table 5. LEfSE identified taxonomic changes from stool microbiomes at 2 weeks post-SCI or sham, from independent cohort**

| <b>Bacterial taxa</b>                                                                                                      | <b>Group</b> | <b>Effect size</b> | <b>p-value</b> |
|----------------------------------------------------------------------------------------------------------------------------|--------------|--------------------|----------------|
| k_Bacteria.p__Firmicutes.c__Clostridia.o__Clostridiales.f__Lachnospiraceae.g__NA.s__sp33761                                | SCI          | 3.20746086         | 0.03938728     |
| k_Bacteria.p__Firmicutes.c__Clostridia.o__Clostridiales.f__Ruminococcaceae.g__Anaerotruncus.s__sp34475                     | SCI          | 3.14434302         | 0.01455464     |
| k_Bacteria.p__Bacteroidetes.c__Bacteroidia.o__Bacteroidales.f__NA.g__NA.s__sp12473_sp12526_sp12633                         | SCI          | 4.29010458         | 0.03319739     |
| k_Bacteria.p__Firmicutes.c__Clostridia.o__Clostridiales.f__Lachnospiraceae.g__NA.s__sp32862                                | SCI          | 3.49736231         | 0.03339209     |
| k_Bacteria.p__Firmicutes.c__Clostridia.o__Clostridiales.f__Lachnospiraceae.g__NA.s__sp32735                                | SCI          | 3.60307215         | 0.02671248     |
| k_Bacteria.p__Firmicutes.c__Clostridia.o__Clostridiales.f__Lachnospiraceae.g__NA.s__sp32721                                | SCI          | 3.47470577         | 0.02675007     |
| k_Bacteria.p__Firmicutes.c__Clostridia.o__Clostridiales.f__Ruminococcaceae.g__NA.s__sp33140                                | SCI          | 2.96559706         | 0.02508897     |
| k_Bacteria.p__Actinobacteria.c__Actinobacteria.o__Corynebacteriales.f__Corynebacteriaceae                                  | SCI.Inulin   | 3.5183703          | 0.01922687     |
| k_Bacteria.p__Firmicutes.c__Clostridia.o__Clostridiales.f__Lachnospiraceae.g__NA.s__sp33731                                | SCI.Inulin   | 3.21037177         | 0.01440632     |
| k_Bacteria.p__Actinobacteria.c__Actinobacteria.o__Corynebacteriales.f__Corynebacteriaceae.g__Corynebacterium               | SCI.Inulin   | 3.51837339         | 0.01922687     |
| k_Bacteria.p__Actinobacteria.c__Actinobacteria.o__Corynebacteriales                                                        | SCI.Inulin   | 3.51837267         | 0.01922687     |
| k_Bacteria.p__Firmicutes.c__Clostridia.o__Clostridiales.f__Lachnospiraceae.g__NA.s__sp32635_sp32668                        | SCI.Inulin   | 3.09090389         | 0.01922687     |
| k_Bacteria.p__Actinobacteria.c__Actinobacteria.o__Corynebacteriales.f__Corynebacteriaceae.g__Corynebacterium.s__amycolatum | SCI.Inulin   | 3.51837192         | 0.01922687     |
| k_Bacteria.p__Firmicutes.c__Clostridia.o__Clostridiales.f__Lachnospiraceae.g__NA.s__sp33432                                | SCI.Inulin   | 3.16044082         | 0.01835448     |
| k_Bacteria.p__Firmicutes.c__Clostridia.o__Clostridiales.f__Lachnospiraceae.g__Acetatifactor                                | SCI.Inulin   | 3.0869611          | 0.0469165      |
| k_Bacteria.p__Firmicutes.c__Clostridia.o__Clostridiales.f__Lachnospiraceae.g__NA.s__sp33421_sp33679                        | SCI.Inulin   | 3.69414989         | 0.00122429     |
| k_Bacteria.p__Firmicutes.c__Bacilli.o__Bacillales.f__Planococcaceae.g__Sporosarcina.s__luteola_pasteurii                   | Sham         | 3.15351433         | 0.04203087     |
| k_Bacteria.p__Firmicutes.c__Bacilli.o__Lactobacillales.f__Lactobacillaceae.g__Lactobacillus                                | Sham         | 4.94539917         | 0.04846866     |
| k_Bacteria.p__Firmicutes.c__Bacilli.o__Lactobacillales.f__Lactobacillaceae                                                 | Sham         | 4.93387968         | 0.04846866     |

| <b>Supplementary Table 5 (continued)</b>                                                                   |              |                    |                |
|------------------------------------------------------------------------------------------------------------|--------------|--------------------|----------------|
| <b>Bacterial taxa</b>                                                                                      | <b>Group</b> | <b>Effect size</b> | <b>p-value</b> |
| k_Bacteria.p__Firmicutes.c__Bacilli.o__Bacillales.f__Staphylococcaceae.g__Staphylococcus.s__lentus         | Sham         | 4.0524116<br>4     | 0.0234515<br>3 |
| k_Bacteria.p__Firmicutes.c__Bacilli.o__Bacillales.f__Planococcaceae                                        | Sham         | 3.1353627<br>7     | 0.0420308<br>7 |
| k_Bacteria.p__Firmicutes.c__Erysipelotrichia.o__Erysipelotrichales.f__Erysipelotrichaceae.g__NA            | Sham         | 3.0456857<br>4     | 0.0094330<br>1 |
| k_Bacteria.p__Firmicutes.c__Erysipelotrichia.o__Erysipelotrichales.f__Erysipelotrichaceae.g__NA.s__sp36786 | Sham         | 3.2849544<br>8     | 0.0010709<br>4 |
| k_Bacteria.p__Firmicutes.c__Clostridia.o__Clostridiales.f__Lachnospiraceae.g__NA.s__sp33694                | Sham         | 3.5179440<br>8     | 0.0196145<br>7 |
| k_Bacteria.p__Firmicutes.c__Clostridia.o__Clostridiales.f__Lachnospiraceae.g__NA.s__sp33673                | Sham         | 3.2005299<br>1     | 0.0242550<br>8 |
| k_Bacteria.p__Firmicutes.c__Bacilli.o__Bacillales.f__Staphylococcaceae.g__Staphylococcus                   | Sham         | 4.2321641<br>6     | 0.0446212<br>7 |
| k_Bacteria.p__Actinobacteria                                                                               | Sham         | 4.407117           | 0.0277423<br>5 |
| k_Bacteria.p__Firmicutes.c__Clostridia.o__Clostridiales.f__Lachnospiraceae.g__NA.s__sp33636                | Sham         | 3.4996426<br>9     | 0.0083140<br>5 |
| k_Bacteria.p__Firmicutes.c__Clostridia.o__Clostridiales.f__Lachnospiraceae.g__Marvinbryantia.s__sp32979    | Sham         | 3.5174996<br>7     | 0.0032249<br>9 |
| k_Bacteria.p__Firmicutes.c__Bacilli.o__Bacillales.f__Staphylococcaceae                                     | Sham         | 4.2207112<br>5     | 0.0446212<br>7 |
| k_Bacteria.p__Firmicutes.c__Clostridia.o__Clostridiales.f__Lachnospiraceae.g__Blautia.s__sp32038           | Sham         | 3.5580099          | 0.0259710<br>1 |
| k_Bacteria.p__Firmicutes.c__Clostridia.o__Clostridiales.f__Lachnospiraceae.g__NA.s__sp33374                | Sham         | 3.3533870<br>6     | 0.0270878<br>6 |
| k_Bacteria.p__Firmicutes.c__Clostridia.o__Clostridiales.f__NA.g__NA.s__sp31125                             | Sham         | 3.0240336          | 0.0050210<br>4 |
| k_Bacteria.p__Firmicutes.c__Bacilli.o__Bacillales.f__Planococcaceae.g__Sporosarcina                        | Sham         | 3.1429381<br>3     | 0.0420308<br>7 |
| k_Bacteria.p__Firmicutes.c__Clostridia.o__Clostridiales.f__Lachnospiraceae.g__NA.s__sp32622                | Sham         | 3.8416875<br>7     | 0.0378540<br>1 |
| k_Bacteria.p__Firmicutes.c__Clostridia.o__Clostridiales.f__Lachnospiraceae.g__NA.s__sp32156                | Sham         | 3.1342279<br>7     | 0.0394250<br>4 |
| k_Bacteria.p__Firmicutes.c__Clostridia.o__Clostridiales.f__Lachnospiraceae.g__Marvinbryantia               | Sham         | 3.6367098<br>1     | 0.0093402      |

**Supplementary Table 6. Reagents & Resources.**

| <b>Antibodies used</b>                               |                      |             |                 |                   |
|------------------------------------------------------|----------------------|-------------|-----------------|-------------------|
| <b>Primary antibodies for Western Blot</b>           |                      |             |                 |                   |
| <b>Antibody</b>                                      | <b>Concentration</b> | <b>Host</b> | <b>Supplier</b> | <b>Cat Number</b> |
| Neuronal nitric oxide synthase (nNOS)                | 1:1000               | Rabbit      | Cell Signaling  | 4231S             |
| Choline acetyltransferase (ChAT)                     | 1:1000               | Goat        | Sigma           | AB144P            |
| Protein gene product 9.5 (PGP9.5)                    | 1:1000               | Rabbit      | Millipore       | AB1761-I          |
| Free fatty acid receptor 2 (FFAR2 / GPR43)           | 1:1000               | Rabbit      | Thermo          | PA5-111780        |
| Glyceraldehyde 3-phosphate dehydrogenase (GAPDH)     | 1:1000               | Rabbit      | Cell Signaling  | 5174S             |
| β-Actin                                              | 1:1000               | Rabbit      | Cell Signaling  | 8457S             |
| <b>Secondary antibodies for Western Blot</b>         |                      |             |                 |                   |
| <b>Antibody</b>                                      | <b>Concentration</b> | <b>Host</b> | <b>Supplier</b> | <b>Cat Number</b> |
| Anti-rabbit (HRP-linked)                             | 1:1000               | Goat        | Cell Signaling  | 7074S             |
| Anti-goat (HRP-linked)                               | 1:1000               | Donkey      | Thermo          | A16005            |
| <b>Primary antibodies for Immunohistochemistry</b>   |                      |             |                 |                   |
| <b>Antibody</b>                                      | <b>Concentration</b> | <b>Host</b> | <b>Supplier</b> | <b>Cat Number</b> |
| Neuronal nitric oxide synthase (nNOS)                | 1:100                | Rabbit      | Cell Signaling  | 4231S             |
| Anti-HuD + HuC antibody                              | 1:500                | Rabbit      | Abcam           | AB184267          |
| Protein gene product 9.5 (PGP9.5)                    | 1:200                | Mouse       | Abcam           | AB72911           |
| <b>Secondary antibodies for Immunohistochemistry</b> |                      |             |                 |                   |
| <b>Antibody</b>                                      | <b>Concentration</b> | <b>Host</b> | <b>Supplier</b> | <b>Cat Number</b> |
| Anti-mouse (Alexa Fluor™ 594)                        | 1:200                | Goat        | Thermo          | A-11005           |
| Anti-rabbit (Alexa Fluor™ 488)                       | 1:200                | Goat        | Thermo          | A-11008           |

| <b>ATCC Strains and Growth Conditions</b> |                           |                    |                       |                    |
|-------------------------------------------|---------------------------|--------------------|-----------------------|--------------------|
| <b>Bacterium</b>                          | <b>Medium</b>             | <b>Environment</b> | <b>CFU per gavage</b> | <b>ATCC Number</b> |
| <i>Lactobacillus johnsonii</i>            | de Man-Rogosa-Sharpe      | Aerobic            | 10 <sup>16</sup>      | 33200              |
| <i>Bacteroides thetaiotaomicron</i>       | Brain-Heart Infusion      | Anaerobic          | 10 <sup>14</sup>      | 29148              |
| <i>Clostridium celatum</i>                | Chopped Meat Carbohydrate | Anaerobic          | 10 <sup>10</sup>      | 27791              |
